# Supplementary material for: Co2+-loaded periodic mesoporous aluminum phosphonates for efficient modified Fenton catalysis
Source: Royal Society of Chemistry journal article supplement (doi:10.1039/c4ra15032e), 2014-12-19
Supplement: c4ra15032e1.pdf [file c4ra15032e1.pdf]

## Electronic Supplementary Information

# **Co<sup>2+</sup>-loaded Periodic Mesoporous Aluminum Phosphonates for Efficient Modified Fenton Catalysis**

Yun-Pei Zhu,<sup>a</sup> Tie-Zhen Ren<sup>b</sup> and Zhong-Yong Yuan<sup>\*,a</sup>

<sup>a</sup> *Key Laboratory of Advanced Energy Materials Chemistry (Ministry of Education), Collaborative Innovation Center of Chemical Science and Engineering (Tianjin), College of Chemistry, Nankai University, Tianjin 300071, China. E-mail: [zyyuan@nankai.edu.cn](mailto:zyyuan@nankai.edu.cn), Tel: +86 22 23509610.*

<sup>b</sup> *School of Chemical Engineering and Technology, Hebei University of Technology, Tianjin 300130, China*

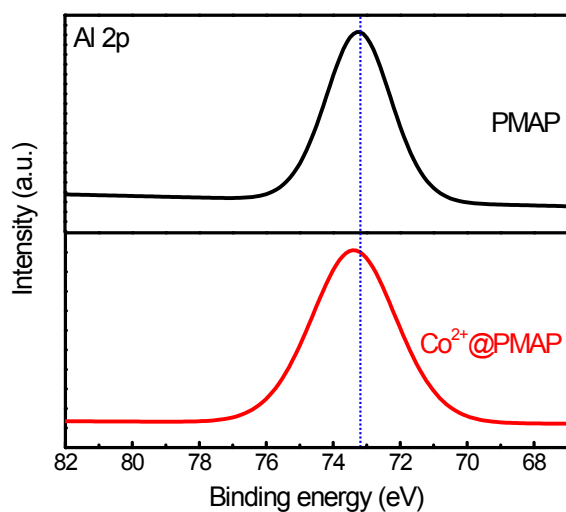

**Fig. S1** High resolution Al 2p, O 1s, P2p, and N1s XPS spectrum of the PMAP and Co<sup>2+</sup>@PMAP materials.

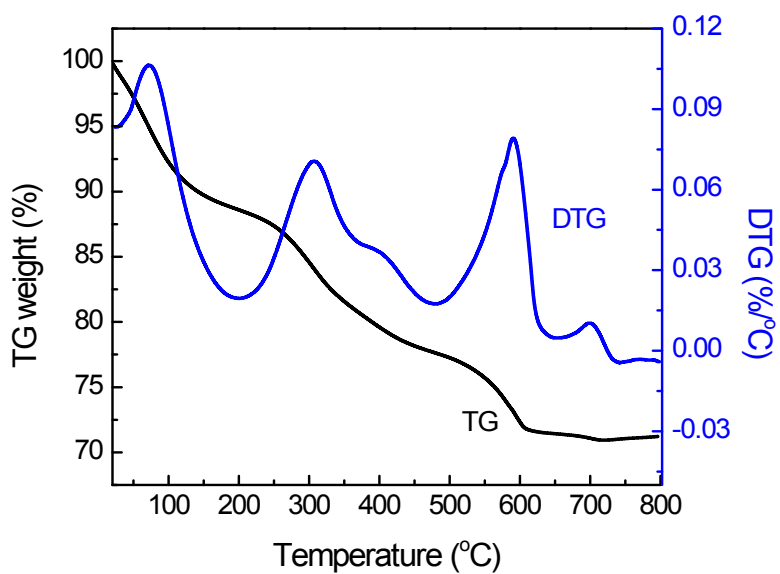

**Fig. S2** TG-DAG curves of the as-synthesized PMAP material.

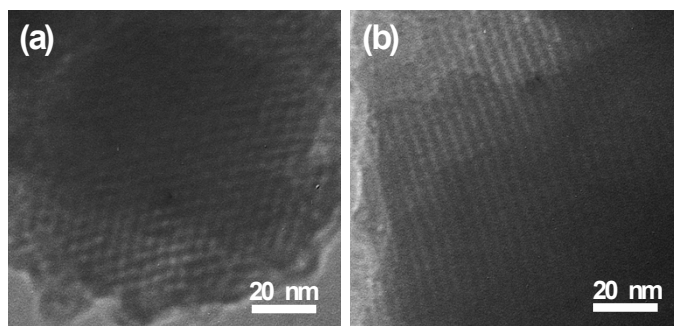

**Fig. S3** TEM images of Co<sup>2+</sup>@PMAP.

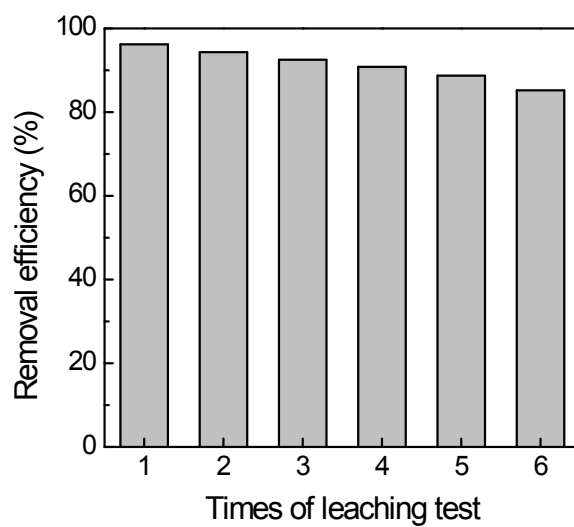

**Fig. S4** Reusability of the PMAP adsorbent for Co<sup>2+</sup> ions ( $0.2 \times 10^{-4}$  mol L<sup>-1</sup>).

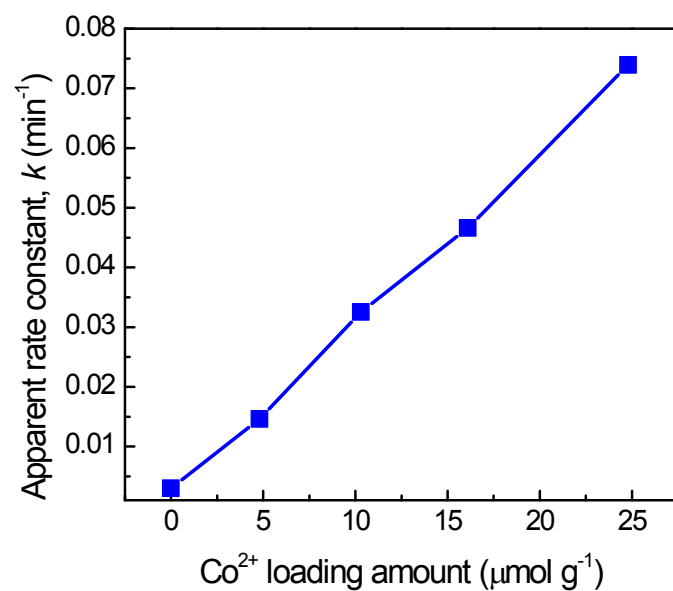

**Fig. S5** Apparent rate constant versus the Co<sup>2+</sup> loading amount on PMAP for phenol degradation after 50 min.

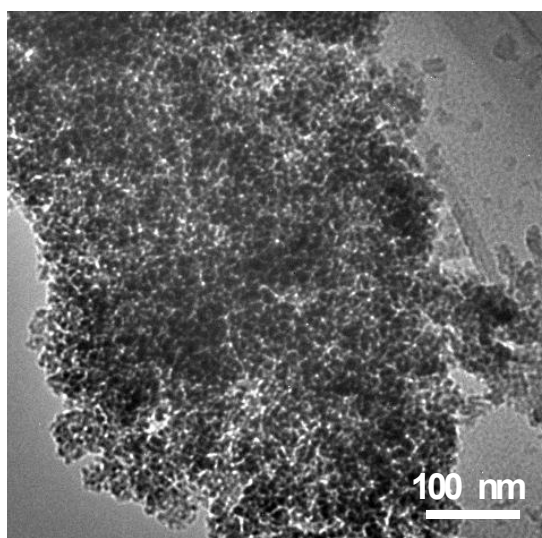

**Fig. S6** TEM image of MAP.
